# Supplementary material
Source: Springer Nature journal article supplement (https://www.springermedizin.de/resource/supplementary/12916_2006_96_MOESM5_ESM.pdf/9599160)
Supplement: MOESM5 [file 9599160]

## Control graph

*Illustration C: The Burden of Chronic Respiratory Disease by Condition and Sex, Victoria 1996*

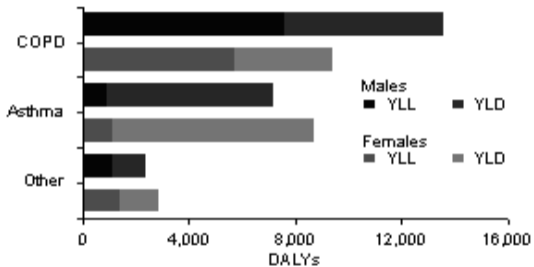

## Intervention graph

*Illustration C: The Burden of Chronic Respiratory Disease by Condition and Sex, Victoria 1996*

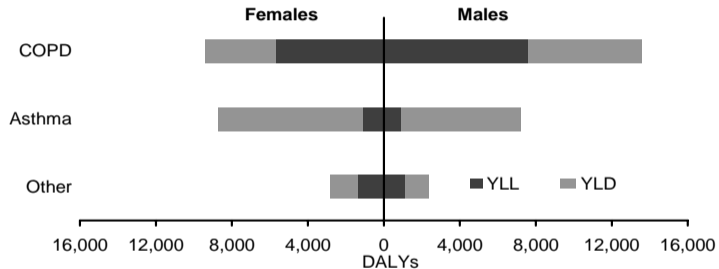

YLL = Years of Life Lost: summarises the total years of life lost from all people that die prematurely of the disease.

YLD = Years Lived with Disability: summarises the total years of healthy life lost due to disability in people living with the disease.

DALY = Disability Adjusted Life Years: total burden = the sum of YLL and YLD: lost years due to both death and disability.
